# Supplementary material for: Benzotrithiophene and benzodithiophene-based polymers for efficient polymer solar cells with high open-circuit voltage
Source: Royal Society of Chemistry journal article supplement (doi:10.1039/c3py00251a), 2013-01-01
Supplement: c3py00251a.pdf [file c3py00251a.pdf]

*Electronic Supplementary Information*

**Benzotrithiophene and benzodithiophene-based polymers for efficient polymer solar cells with high open-circuit voltage**

**Guobing Zhang,<sup>\*a</sup> Jianyu Yuan,<sup>b</sup> Peng Li,<sup>ac</sup> Jingxuan Ma,<sup>c</sup> Hongbo Lu,<sup>a</sup> Longzhen Qiu <sup>\*a</sup> and Wanli Ma<sup>\*b</sup>**

<sup>a</sup>Key Lab of Special Display Technology, Ministry of Education, National Engineering Lab of Special Display Technology, State Key Lab of Advanced Display Technology, Academy of Opto-Electronic Technology, Hefei University of Technology, Hefei, 230009, China. E-mail: [gbzhang@hfut.edu.cn](mailto:gbzhang@hfut.edu.cn), [lzqiu@ustc.edu](mailto:lzqiu@ustc.edu)

<sup>b</sup>Institute of Functional Nano & Soft Materials (FUNSOM), Soochow University 199 Ren-Ai Road, Suzhou Industrial Park, Suzhou, Jiangsu 215123, P. R. China; E-mail: [wlma@suda.edu.cn](mailto:wлма@suda.edu.cn)

<sup>c</sup>Department of polymer Science and Engineering, School of chemistry and chemical Engineering, Hefei University of Technology, Hefei, 230009, China.

**Contents**

**1. Characterization**

**a) Normalized UV-vis spectra of P1/PC<sub>71</sub>BM/DIO and P2/PC<sub>71</sub>BM/DIO**

**b) Nuclear Magnetic Resonance (NMR) spectra**

**c) GPC results**

## 1. Characterization

### a) Normalized UV-vis spectra of polymer/PC<sub>71</sub>BM/DIO

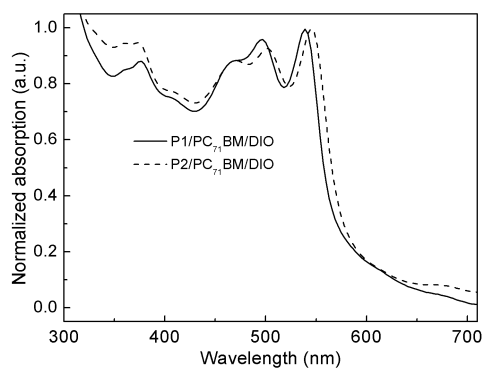

Fig. S1 Normalized UV-vis spectra of polymer/PC<sub>71</sub>BM/DIO.

### b) NMR spectra of monomers and polymers

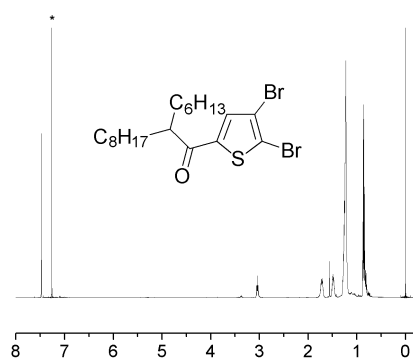

Fig. S2 <sup>1</sup>H NMR spectra of compound **1** in CDCl<sub>3</sub>.

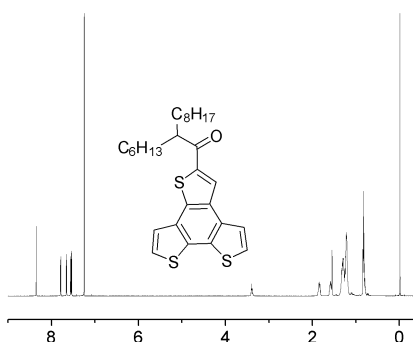

Fig. S3 <sup>1</sup>H NMR spectra of compound **3** in CDCl<sub>3</sub>.

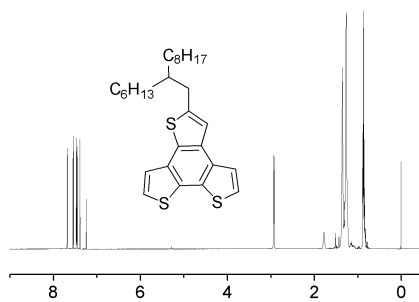

**Fig. S4**  $^1\text{H}$  NMR spectra of compound **4** in  $\text{CDCl}_3$ .

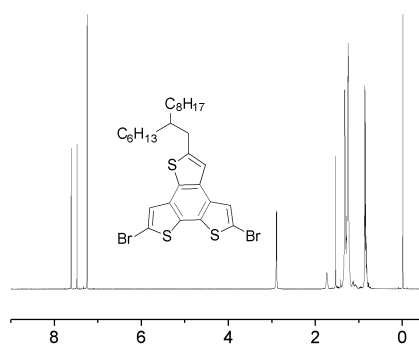

**Fig. S5**  $^1\text{H}$  NMR spectra of compound **5** in  $\text{CDCl}_3$ .

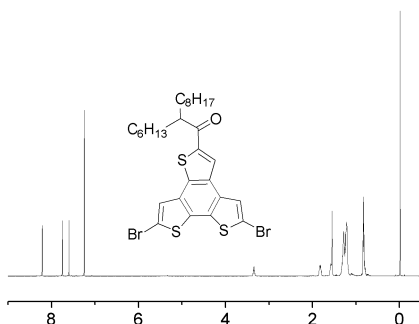

**Fig. S6**  $^1\text{H}$  NMR spectra of compound **6** in  $\text{CDCl}_3$ .

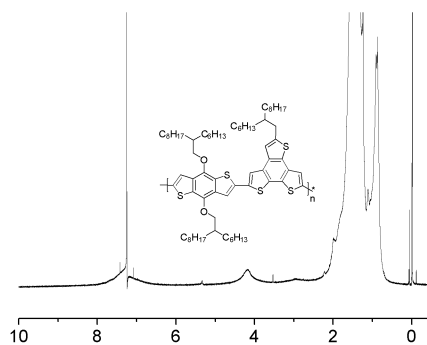

**Fig. S7**  $^1\text{H}$  NMR spectra of **P1** in  $\text{CDCl}_3$ .

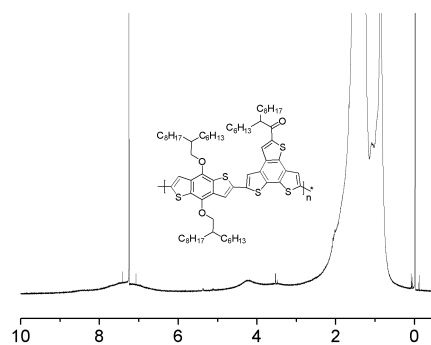

**Fig. S8**  $^1\text{H}$  NMR spectra of **P2** in  $\text{CDCl}_3$ .

c) GPC curves

GPC results of **P1**

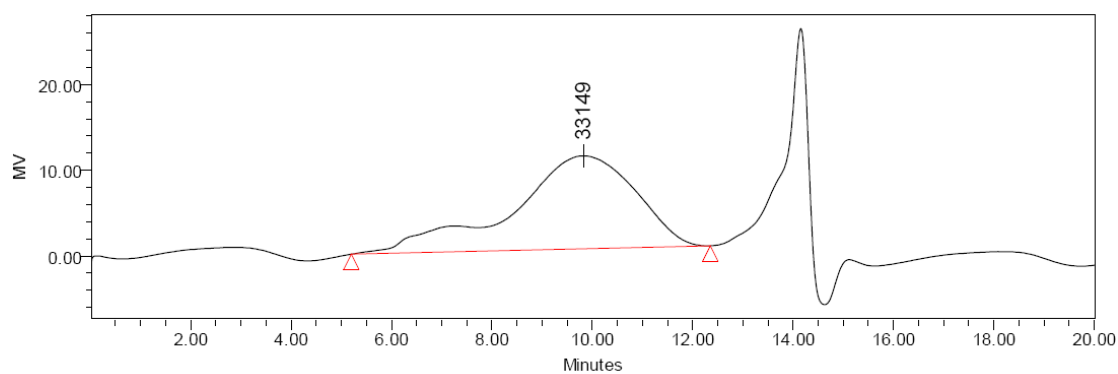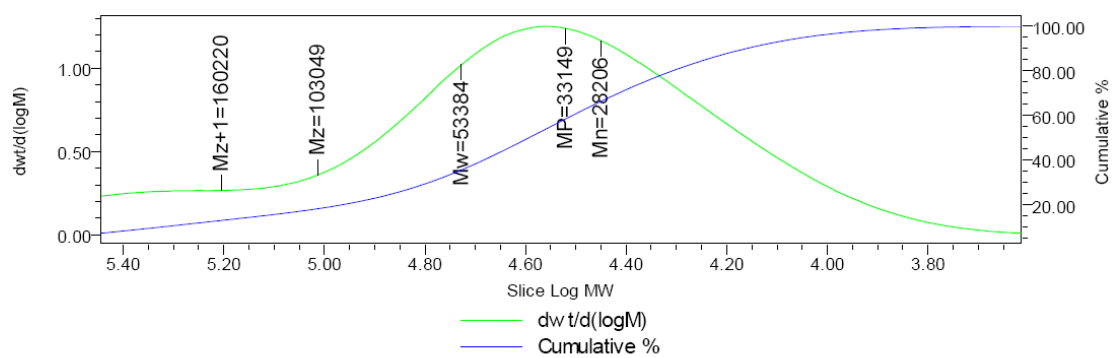

GPC Sample Results

|   | Retention Time | Mn    | Mw    | MP    | Mz     | Poly-dispersity |
|---|----------------|-------|-------|-------|--------|-----------------|
| 1 | 9.828          | 28206 | 53384 | 33149 | 103049 | 1.893           |

### GPC results of P2

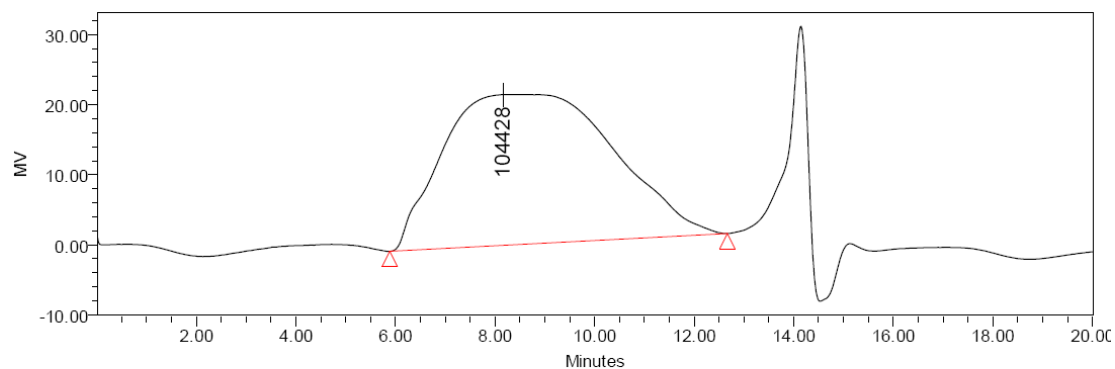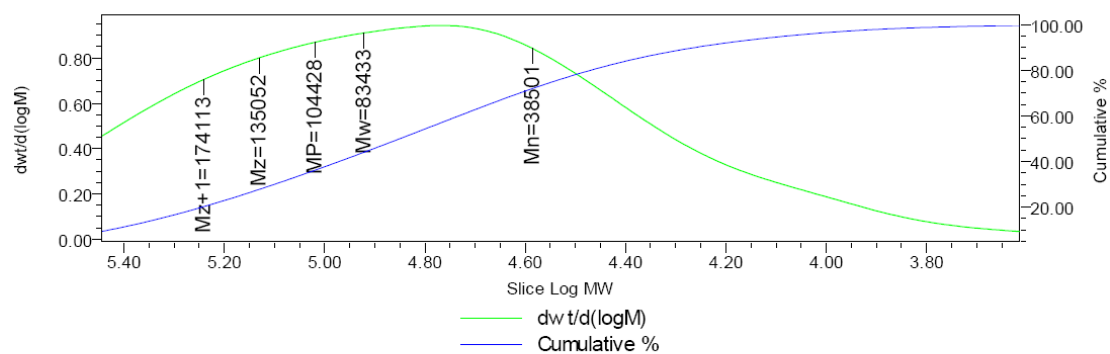

GPC Sample Results

|   | Retention Time | Mn    | Mw    | MP     | Mz     | Poly-dispersity |
|---|----------------|-------|-------|--------|--------|-----------------|
| 1 | 8.164          | 38501 | 83433 | 104428 | 135052 | 2.167           |
